# Supplementary material for: Myo2p is the major motor involved in actomyosin ring contraction in fission yeast
Source: PubMed Central journal article supplement (PMC5300900; doi:10.1016/j.cub.2016.12.024), 2017-02-06
Supplement: mmc1.pdf [file mmc1.pdf]

## **Supplemental Information**

### **Myo2p is the major motor involved in actomyosin ring contraction in fission yeast**

Paola Zambon, Saravanan Palani, Anton Kamnev and Mohan K. Balasubramanian



**Figure S1. Actomyosin ring assembly, dwelling and contraction of wild type *S. pombe* and myosin mutants.**

(A) Time-lapse image series of mitotic cells of wild-type Blt1-GFP and *myo2* $\Delta$  Blt1-GFP germinated from spores. Scale bars represent 3  $\mu$ m. (B–D) Time-lapse image series of mitotic cells of seven genotypes (wild-type, *myo2*-E1, *myp2* $\Delta$ , *myo51* $\Delta$ , *myp2* $\Delta$  *myo51* $\Delta$ , *myo2*-E1 *myp2* $\Delta$ , *myo2*-E1 *myo51* $\Delta$ ), respectively. In all cases, Rlc1-3GFP was used as a marker of cytokinetic nodes and the actomyosin ring and alpha tubulin 2 (mCherry-atb2) served as a cell-cycle marker (t = 0 denotes the elongation of the spindle  $\sim$ 1  $\mu$ m). Time-lapse movies were taken at (B) 25°C, (C) 30°C and (D) 36°C, respectively. In (B), time points between 33 and 54 minutes were highlighted with blue dotted square box in the *myo2*-E1 *myo51* $\Delta$  cells. Scale bars represent 3  $\mu$ m.

## Supplemental Experimental Procedures

### Yeast strains and growth conditions

The *S. pombe* strains used in this study are listed below and all of them have been verified by PCR and DNA sequencing using appropriate primers. *S. pombe* cell culture, genetic and growth conditions for live-cell imaging were used as previously described [S1,S2].

### Table of strains used in this study

|            |                                                                                          |
|------------|------------------------------------------------------------------------------------------|
| MBY8841    | mCherry-atb2::hph; Rlc1-3GFP::KanMX6; ura4-D18 ade6-210 leu1-32 h+                       |
| MBY10024-1 | <i>myo2</i> -E1 mCherry-atb2::hph Rlc1-3GFP::KanMX6 h+                                   |
| MBY10075   | <i>myp2</i> ::NatMX6 mCherry-atb2::hph; Rlc1-3GFP::KanMX6 ade6-21                        |
| MBY10097   | <i>myo2</i> -E1 <i>myp2</i> ::NatMX6 mCherry-atb2::hph Rlc1-3GFP::KanMX6 ade6-21         |
| MBY10995   | <i>myo51</i> ::ura4 <i>myp2</i> ::NatMX6 mCherry-atb2::hph Rlc1-3GFP::KanMX6             |
| MBY10996   | <i>myo51</i> ::ura4 mCherry-atb2::hph Rlc1-3GFP::KanMX6                                  |
| MBY11002   | h90/h90 <i>myo2</i> $\Delta$ /+ strain a ( <i>myo2</i> $\Delta$ ::ura4) Blt1-GFP::NatMX6 |
| MBY11129   | <i>myo2</i> -E1 <i>myo51</i> ::ura4 Rlc1-3GFP::KanMX6 mCherry-atb2::hph h+               |

### Live-cell imaging

For time-lapse live-cell imaging, mid log phase cells were grown at 25°C and shifted to 30°C and/or 36°C for 3–4 hours prior to imaging. Time-lapse movies were taken under fully controlled 30°C and/or 36°C incubation chamber while the images were acquired for 3–4 hours. YES Agarose pad imaging method was used for time-lapse imaging as described [S2]. Time-lapse series were acquired using a spinning disk confocal microscope (Andor Revolution XD imaging system, equipped with a 100x oil immersion 1.45NA Nikon Plan Apo lambda, and a confocal unit Yokogawa CSU-X1, EMCCD detector (Andor iXON) and Andor iQ acquisition software. Fifteen z-stacks of 0.5  $\mu$ m thicknesses at 1-minute intervals were taken for Rlc1-3GFP (myosin regulatory light chain 1), which served as contractile ring marker and alpha tubulin 2 (mCherry-atb2) served as a cell-cycle marker. We defined the timing of assembly from coalescence of nodes into a condensed single ring ( $t = 0$  denotes the

elongation of the spindle  $\sim 1 \mu\text{m}$ ). The time between full ring assembly and initiation of contraction was considered as dwelling time. We determined the timing of ring contraction from a complete ring into a dot or no fluorescence. Scale bar  $3 \mu\text{m}$ . Images were processed using Fiji software.

### **Ring contraction rate measurement**

The rate of ring contraction was measured similarly as described [S3]. First, kymographs of contracting cytokinetic ring (15 z-stacks of  $0.5 \mu\text{m}$  thickness taken for  $7 \mu\text{m}$  at 1-minute intervals) were constructed from maximum intensity projection of original time series along the z-axis. Next, ring contraction velocity was measured as a slope formed by migrating ring edge to the time-axis. On average we measured 20~30 rings per group.

### **Supplemental References**

- S1. Moreno, S., Klar, A., and Nurse, P. (1991). Molecular genetic analysis of fission yeast *Schizosaccharomyces pombe*. *Methods Enzymol.* 194, 795-823.
- S2. Huang, J., Huang, Y., Yu, H., Subramanian, D., Padmanabhan, A., Thadani, R., Tao, Y., Tang, X., Wedlich-Soldner, R., and Balasubramanian, M.K. (2012). Nonmedially assembled F-actin cables incorporate into the actomyosin ring in fission yeast. *J. Cell Biol.* 199, 831-847.
- S3. Laplante, C., Berro, J., Karatekin, E., Hernandez-Leyva, A., Lee, R., and Pollard, T.D. (2015). Three myosins contribute uniquely to the assembly and constriction of the fission yeast cytokinetic contractile ring. *Curr. Biol.* 25, 1955-1965.
